# Supplementary material for: A Chinese Prescription Yu-Ping-Feng-San Administered in Remission Restores Bronchial Epithelial Barrier to Inhibit House Dust Mite-Induced Asthma Recurrence
Source: PubMed Central journal article supplement (PMC7006455; doi:10.3389/fphar.2019.01698), 2020-01-31
Supplement: DataSheet_1.pdf [file DataSheet_1.pdf]

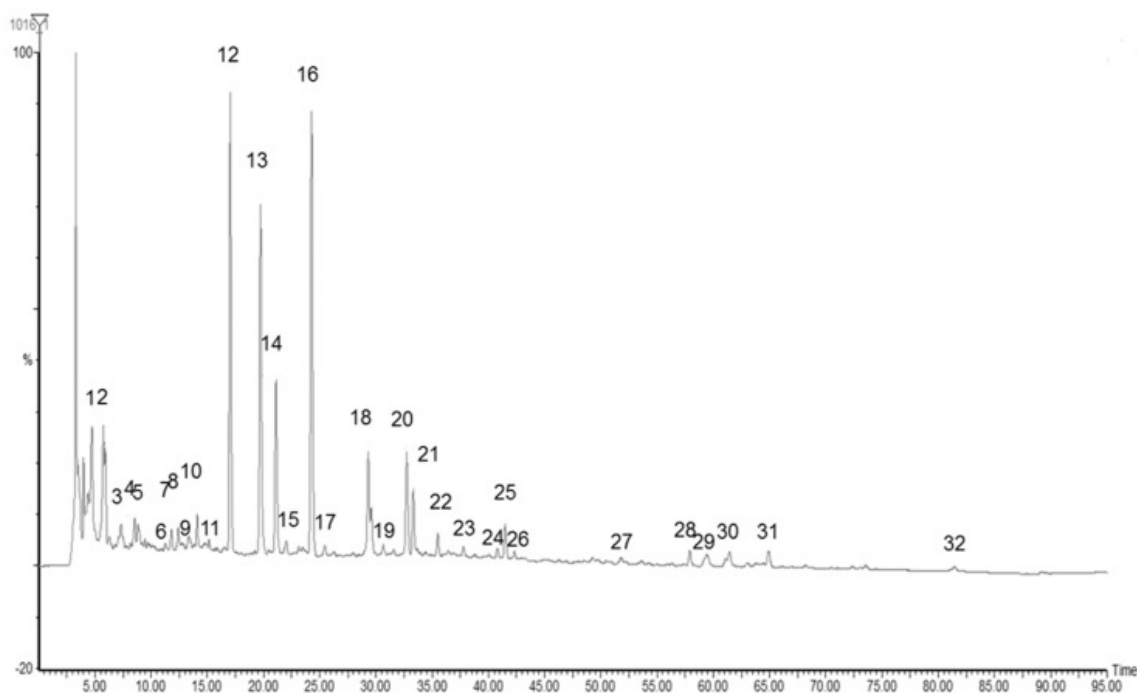

**Figure S1 HPLC fingerprint of YPFS extract at 254 nm.** A total of 32 main peaks were detected in the fingerprint of YPFS established by HPLC-MS (doi: 10.1371/journal.pone.0107279).

**Table S1** Relative retention time (RRT) and relative peak area (RPA) of each peak in the fingerprint of YPFS extract (doi: 10.1371/journal.pone.0107279).

| No. | RRT      | RPA       | Identified compounds                     |
|-----|----------|-----------|------------------------------------------|
| 1   | 0.195039 | 0.409416  |                                          |
| 2   | 0.237648 | 0.4078    |                                          |
| 3   | 0.301521 | 0.077928  |                                          |
| 4   | 0.35163  | 0.056677  |                                          |
| 5   | 0.363823 | 0.0987593 |                                          |
| 6   | 0.463535 | 0.0121612 |                                          |
| 7   | 0.486958 | 0.039583  |                                          |
| 8   | 0.511683 | 0.041818  |                                          |
| 9   | 0.54162  | 0.037255  |                                          |
| 10  | 0.581036 | 0.047355  |                                          |
| 11  | 0.625051 | 0.031994  |                                          |
| 12  | 0.7019   | 0.843082  | Prim-O-glucosylcimifugin                 |
| 13  | 0.813162 | 0.766692  | Calycosin-7-glucoside copyranoside       |
| 14  | 0.869494 | 0.394774  | Cimifugin                                |
| 15  | 0.906581 | 0.035079  |                                          |
| 16  | 1        | 1         | 4'-O-glucopyranosyl-5-O-methylvisamminol |
| 17  | 1.048749 | 0.02977   |                                          |
| 18  | 1.208102 | 0.367158  | Ononin                                   |
| 19  | 1.263032 | 0.025007  |                                          |

|    |          |          |                        |
|----|----------|----------|------------------------|
| 20 | 1.348869 | 0.247059 | Calycosin              |
| 21 | 1.372934 | 0.129639 | Sec-o-glucosylhamaudol |
| 22 | 1.462892 | 0.047043 |                        |
| 23 | 1.55697  | 0.021852 |                        |
| 24 | 1.681296 | 0.020301 |                        |
| 25 | 1.710141 | 0.082697 | Formononetin           |
| 26 | 1.743808 | 0.018922 |                        |
| 27 | 2.134322 | 0.017997 |                        |
| 28 | 2.386657 | 0.038159 |                        |
| 29 | 2.448469 | 0.067835 |                        |
| 30 | 2.531545 | 0.056232 |                        |
| 31 | 2.675114 | 0.04355  |                        |
| 32 | 3.351017 | 0.02101  |                        |

---
